# Supplementary material
Source: PubMed Central journal article supplement (PMC4038566)
Supplement: JCI71533sd.pdf [file JCI71533sd.pdf]

# Suppl. Fig.1. Picarda et al.

## A

### MHC class I : RT1.A

RT1.A<sup>u</sup>(recipient) Leader peptide MAPRTL L L L L L L A A A L A P T Q T R A G  
 RT1.A<sup>d</sup>(donor) L A A A L A Q T G T R A G S H S (1)

**α1 domain**  
 SHSLRYFYTA VSRPGLGEP R F I A V G Y V D D T E F V R F D S D A E N P R M E P R A R W M E R E G P E Y W E Q Q T R I A K E W E Q I Y R V D L R L T R G Y Y N O S E G  
 S H S L R Y F L T A V S R P G L (2) D D T E F V R Y D S D A E N P R (3) P E Y W E R E T Q G A G H E Q (5) E R E T Q G A G H E Q V N R V (6) G G A K G H E Q V N R V L R T (7) G H E Q V N R V L R L T R L R G Y (8)

**α2 domain**  
 G S H T I Q E M Y G C D V G S D G S L L R G Y R Q D A Y D G R D Y I A L N E D L K T W T A A D F A A Q I T R N K W E R A R Y A E R L R A Y L E G T C V E W L S R Y L E L G K E T L L R S  
 G S H T I Q V M F G C D V G T D (9) Q I T R N K L E R D G D A D Y Y (12) L E S L R R Y L E L G K E R L L (18) I Q V M F G C D V G T D W S L L (10) N K L E R D D D A D Y Y K A Y L (13) R R Y L E L G K E R L L R S D P (19) F G C D V G T D W S L L R G Y R (11) R D G D A D Y Y K A Y L E G T C (14) A D Y Y K A Y L E G T C L E S L (15) K A Y L E G T C L E S L R R Y L (16) E G T C L E S L R R Y L E L G K (17)

**α3 domain**  
 D P P E A H V T L H P R P E G D V T L R C W A L G F Y P A D I L T W Q L N G E D L T Q D M E L V E T R P A G D G T F Q K W A S V V V P L G K E Q N Y T C R V E H E G L P K P L S Q R W  
 K E Q N Y T C L V E H E G L P E (20) C L V E H E G L P E P L S Q R W (21)

## B

### MCH class II : RT1.B

**α1 domain**  
 A D H V G S Y G I E M Y Q Y Y E S K Q Y T F E F D G D E K F Y V D L D K K E T I W R I P E F G Q L T S F D P Q G G L Q E M A T A K H N L L E L L I K R S N S T P A V N  
 G S Y G I T V Y Q Y Y E S K Q Q (70) S F D P Q G A L Q S I A T I K Y (72) S K Q Q Y T H E F D G D E R F Y (71) Q G A L Q S I A T I K Y N L E I (73) Q S I A T I K Y N L E I L T K R (74) T I K Y N L E I L T K R S N S T (75) N L E I L T K R S N S T S A V N (76)

**α2 domain**  
 E V P E A T V F S K S P V L L Q Q P N T L I C F V D N I F P P V I N I T W L R N S K P V T E G Y Y E T S F L S N P D H S F H K M S Y L T F I P S N D D I Y D C K V E H W G L D K P V L R H W  
 S F H K M A Y L T F I P S N D D (77) C K V E H W G L D E P V L R H W (78)

**Transmembrane**  
 E P E I P A P M S E L T E T V V C A L G L S V G L V G I V V G T I F I I Q G L R S D G S R R H P G P L  
 E P E V P A P M S E L T E T V V (79) G T I F I I K G L R S G G S S R (80)

**β1 domain**  
 R D S P R D F V Y Q F K G Q C Y Y T N G T Q R I R G V I R Y I Y N R E E Y V R Y D S D V G E Y R A L T Q L G R P D A E Y Y N K Q Y L E Q T R A Q V D T V C R H N Y E E T V P T S L R R L E Q P  
 R D S R R D L V D F K P Y C Y (22) N G E Y R A V T E L G R P S A E Y (33) V E S F R E L G E Y R A V T E L G R P S A E Y F N K Q (34) L G R P S A E Y F N K Q Y L E R (35) S A E Y F N K Q Y L E R T R A E (36) F N K Q Y L E R T R A E L D T V (37) Y L E R T R A E L D T V C R H N (38) T R A E L D T V C R H N Y E K T (39) L D T V C R H N Y E K T E V P T (40) C R H N Y E K T E V P T S L R R (41) Y E K T E V P T S L R R L E Q P (42) V Q F K P Y C Y F T N G (23) P Y C Y F T N G T Q R I R N V I (25) T Q R I R N V I R Y I Y N R E E (27) R N V I R Y I Y N R E E Y L R Y (28) R Y I Y N R E E Y L R Y D S D V (29) N R E E Y L R Y D S D V G E Y R (30) Y L R Y D S D V G E Y R A V T E (31) D S D V G E Y R A V T E L G R P (32)

**β2 domain**  
 E Q P N V A I S L S R T E A L N H H N L L V C S V T D F Y P A Q I K V R W F R N G R E E T A G V V S T Q L I R N G D W T F Q I L V M L E M T P Q R G E V Y I C H V D H P S L E S P V T V E W  
 F R N G Q E E M A G V V S T Q L (63) P Q R G D V Y T C R V D H P S L (64) D V Y T C R V D H P S L D S P V (65) C R V D H P S L D S P V T V E W (66)

**Transmembrane**  
 R A Q S E S A Q S K M L S G I G G F V L G V I F L G L G L F I R H K R Q K G P R G P P A G L L Q  
 L S G I G G L V L G V I F L G L (67) F I H Y K S Q K G P Q G P P A G (68) K S Q K G P Q G P P A G L L Q (69)

## C

### MHC class II : RT1.D

**Leader Peptide**  
 M M W L P R D S C V A A V I L L L T V L S P P V A L V R D P T  
 M V W L A R D S C V A A V I L L (81)

**α2 domain**  
 V I P E V T V L P K S P V N L G E P N I L I C F I D K F S P P A V N V T W L R N G Q P V T K G V S E T V F L P R E D H L F R K H Y L T F L P S T E D Y Y D C E V D H W G L E E P L R K H W  
 H Y L T F L P S V E D Y Y D C E (82)

**β1 domain**  
 V R D P T P R F L L Q Q K S E C H F Y N G T Q R V R F L D R N I Y N R E E F A R F D S D V G E Y R A V T E L G R S I A E Y L N K Q K E F M E Q A R A A V D T I C R H N Y G V V K Y F . . . R T  
 R D P T P R F L G Y L K F E C H (43) A V T E L G R P S A E Y R N K Q (53) P R F L G Y L K F E C H F Y N G (44) L G R P S A E Y R N K Q K E F M (54) G Y L K F E C H F Y N G T Q R V (45) S A E Y R N K Q K E F M E R R R (55) F E C H F Y N G T Q R V R L L A (46) R N K Q K E F M E R R R A A V D (56) F Y N G T Q R V R L L A R L I Y (47) K E F M E R R R A A V D T Y C R (57) T Q R V R L L A R L I Y N R E E (48) E R R A A V D T Y C R H N Y E (58) R L L A R L I Y N R E E Y A R F (49) A A V D T Y C R H N Y E I F D R (59) R L I Y N R E E Y A R F D S D V (50) T Y C R H N Y E I F D R F L V P (60) N R E E Y A R F D S D V G E Y R (51) H N Y E I F D R F L V P R R V E (61) Y A R F D S D V G E Y R A V T E (52) E I F D R F L V P R R V E P Q V (62)

**Suppl. Figure 1: Aa sequence alignment of the recipient a-haplotype (upper sequence) and donor u-haplotype (lower sequence) RT1 molecules. Sixteen aa-long overlapping peptides (82 synthetic peptides) were chosen along the polymorphic regions of the MHC-I RT1.A<sup>u</sup> (α1, α2 and α3 domains) (A), MHC-II RT1.B<sup>u</sup> (all domains) (B) and RT1.D<sup>u</sup> (α2, β1 domains) (C).**

Suppl. Fig. 2. Picarda et al.

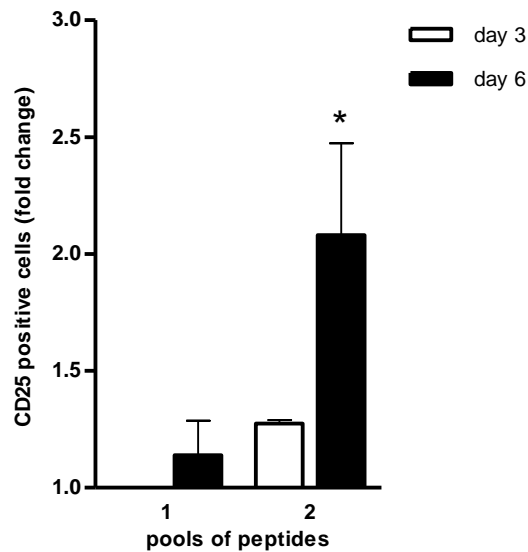

**Suppl. Figure 2: 6 days of stimulation with matured pDCs and pools of peptides efficiently activates CD8<sup>+</sup> Tregs.** Peptides were grouped into pools of peptides and tested in an *in vitro* assay where mature syngeneic recipient pDCs and sorted-CD8<sup>+</sup>CD40Ig Treg cells from CD40Ig-treated long-term allograft bearing recipients were cocultured for 3 or 6 days. Results are expressed as the ratio  $\pm$  SEM between the percentage of CD25 positive cells after peptide stimulation and percentage of CD25 positive cells in the control condition without peptide. \* $p < 0.05$ ,  $n = 3$  to 7.

Suppl. Fig. 3. Picarda et al.

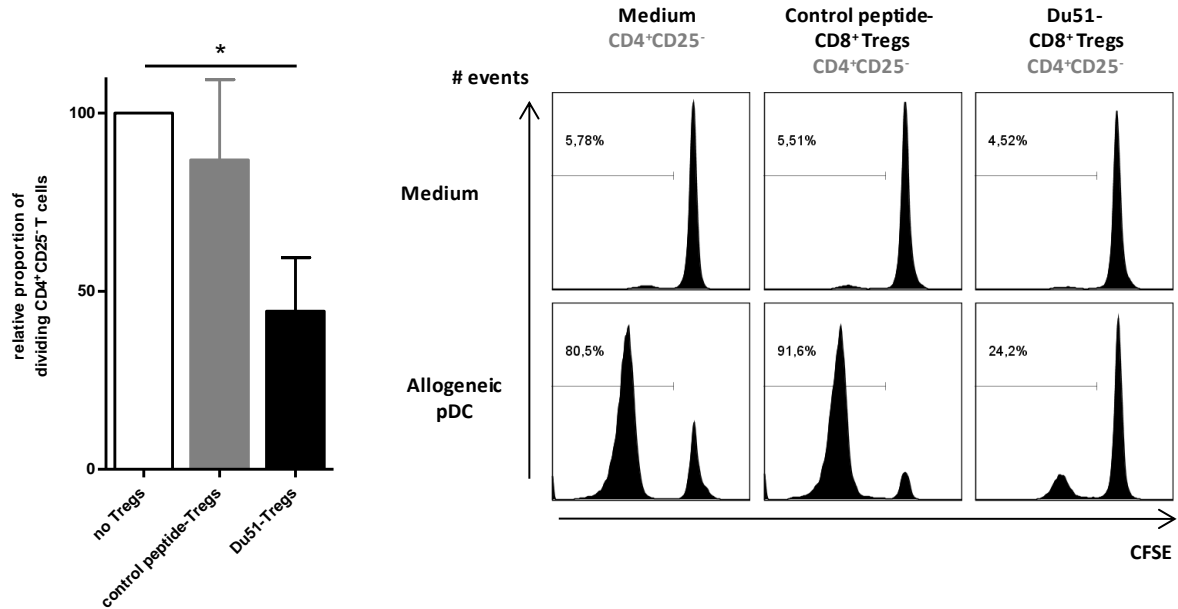

**Suppl. Figure 3: Du51-activated Tregs maintained efficient suppressive activity.** Fresh CD8<sup>+</sup>CD40Ig Tregs and syngeneic CpG-matured pDCs were cocultured for 6 days with either Du51 or a control peptide. At day 6, Tregs were isolated by cell sorting (TCR<sup>+</sup>) and their regulatory function was analyzed by measuring their capacity to suppress MLR assay. The **relative proportion of** naive CFSE-labeled **dividing** LEW.1A CD4<sup>+</sup>CD25<sup>-</sup> T cells **after stimulation** with donor LEW.1W pDCs was analyzed **at day 6 of culture**, in the absence or presence of 6 days peptide-stimulated CD8<sup>+</sup> Tregs at a 1:1 ratio effector:suppressor. Graphs represent the mean±SEM. \*p<0.05 (left). Plots are representative of four independent experiments (right).

Suppl. Fig. 4. Picarda et al.

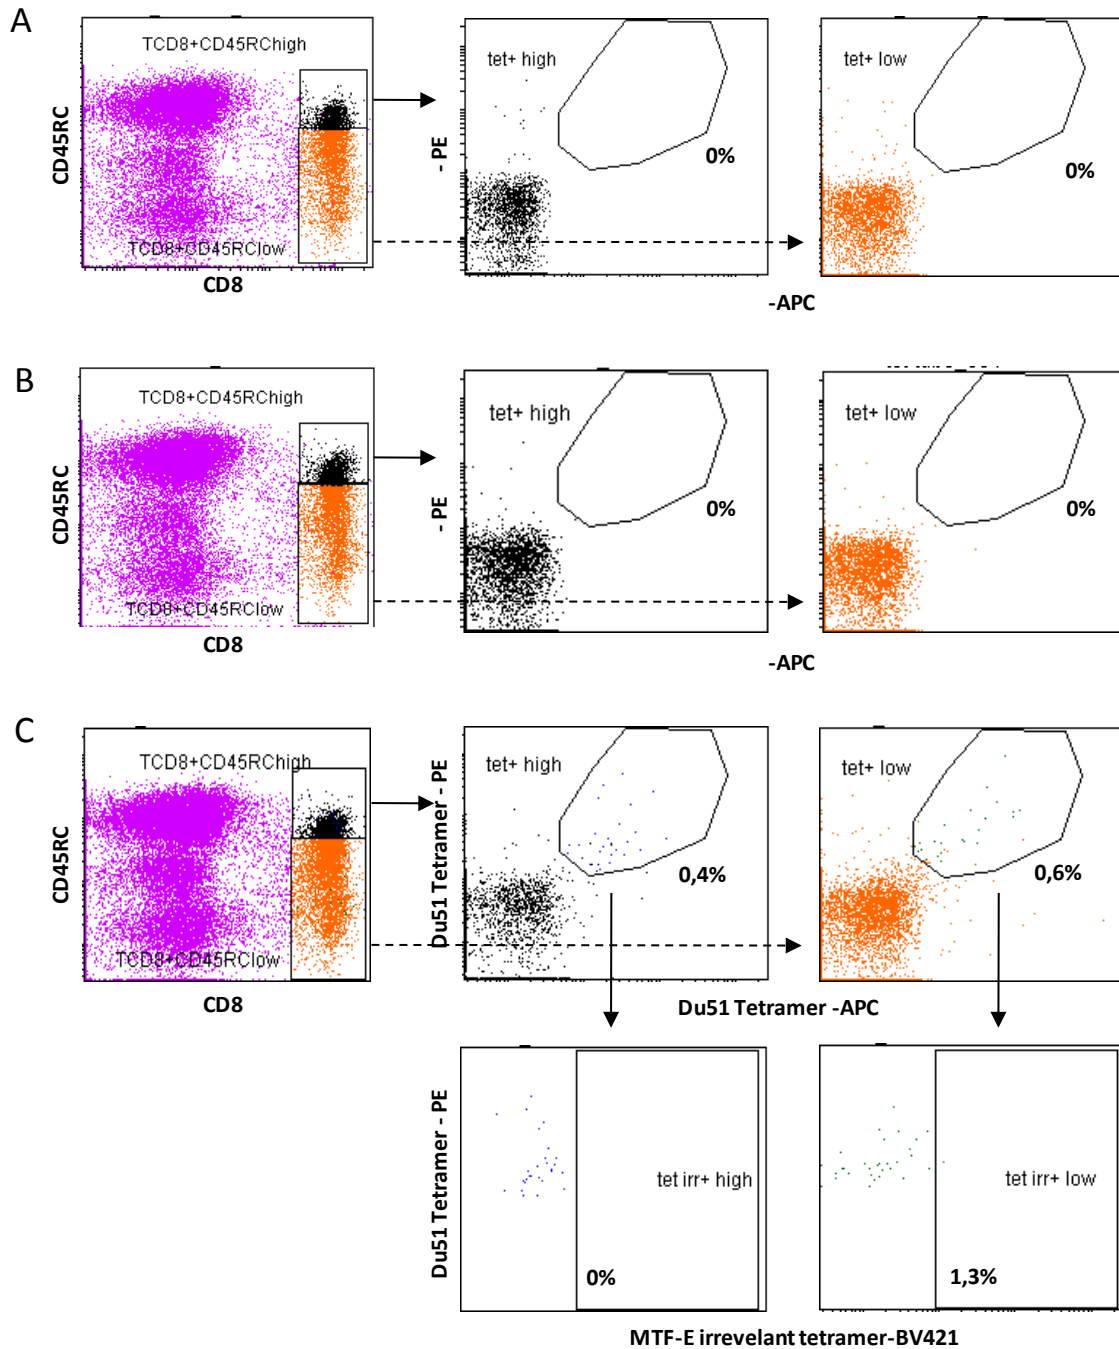

**Suppl. Figure 4: Du51-specific Tregs identification in naive animals.** T cells-enriched spleens of naive animals were incubated with no tetramer (A), irrelevant RT1.A<sup>a</sup>/MTF-E tetramer labeled with BV421 (B), or both RT1.A<sup>a</sup>/MTF-E-BV421 and RT1.A<sup>a</sup>/Du51 tetramers labeled with streptavidin conjugated to PE and APC (C). Panels show representative plots.

Suppl. Fig. 5. Picarda et al.

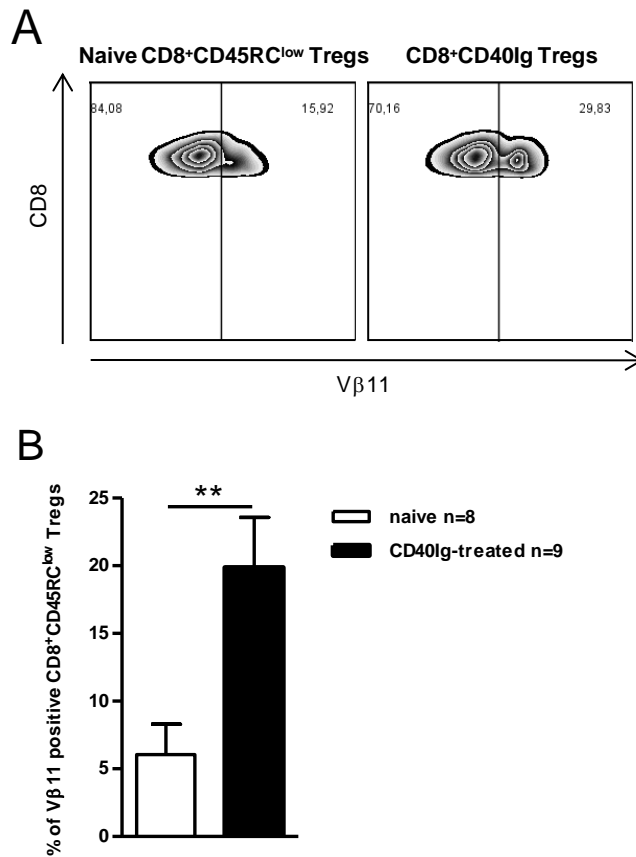

**Suppl. Figure 5: Vbeta 11 chain was preferentially recombined in CD8<sup>+</sup>CD45RC<sup>low</sup> T cells.** (A) Vβ11 chain protein expression by CD8<sup>+</sup>CD45RC<sup>low</sup> T cells from naive LEW.1A and CD40Ig-treated rats. Background was measured with a control isotype antibody and is less than 9%. Data are representative of nine independent experiments. (B) Data are summarized and background non-specific staining was subtracted, plotting mean ± SEM of Vβ11 positive cells. \*\*p<0.01, n=8 and 9 for naive and CD40Ig-treated rats respectively.

Suppl. Fig. 6. Picarda et al.

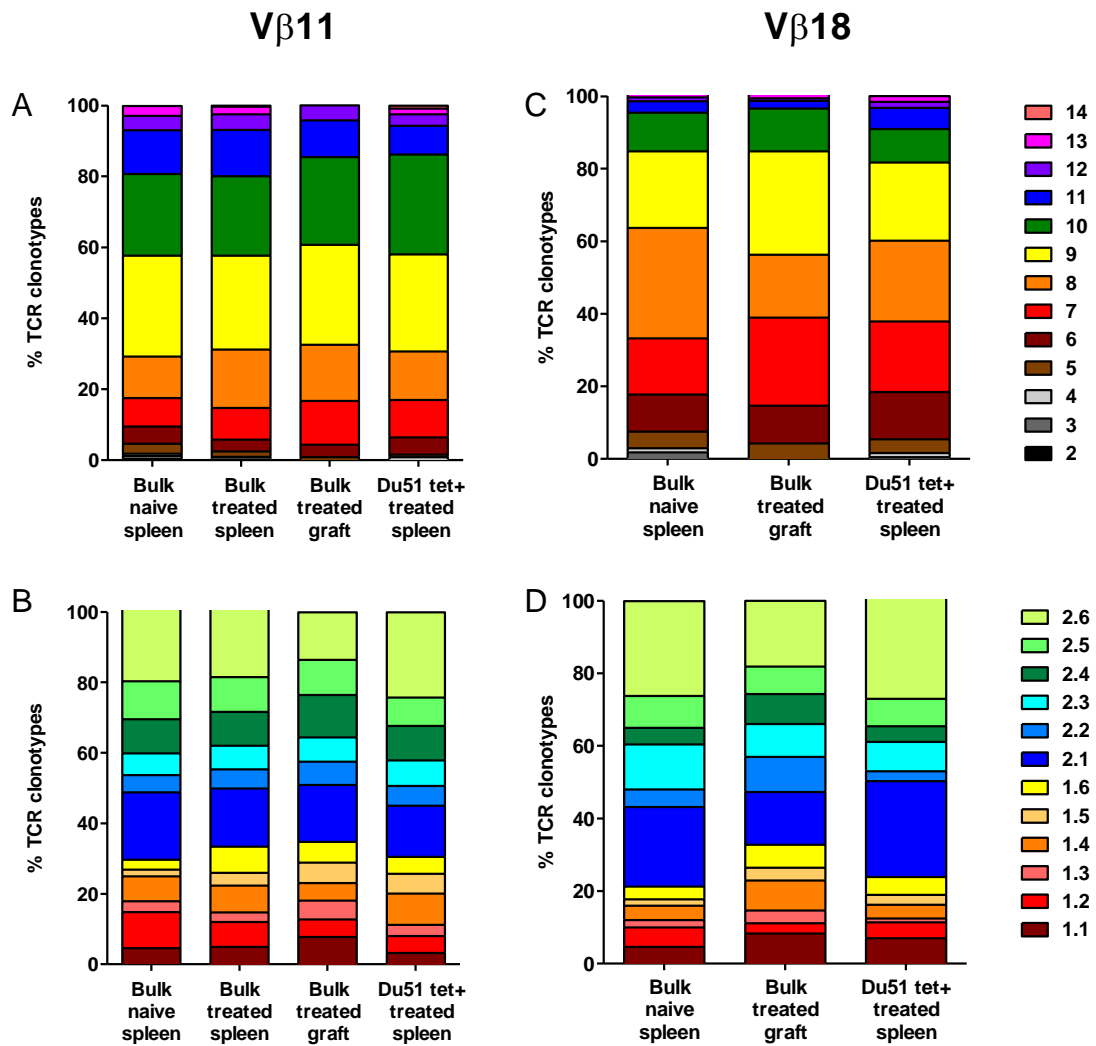

**Suppl. Figure 6: Summary of the features of Vβ11 (A, B) and Vβ18 (C, D) TCR aa repertoires obtained from CD8<sup>+</sup>CD45RC<sup>low</sup> Tregs of naive spleens versus Bulk or Du51 tetramer<sup>+</sup> CD8<sup>+</sup>CD40IgTregs from spleens or GITCs of CD40Ig-treated grafts. Shown are the percentages of the TCRβ aa clonotypes pooled across all animals per group using a particular CDR3 length (A, C) and Jβ gene usage (B, D).**

Suppl. Fig. 7. Picarda et al.

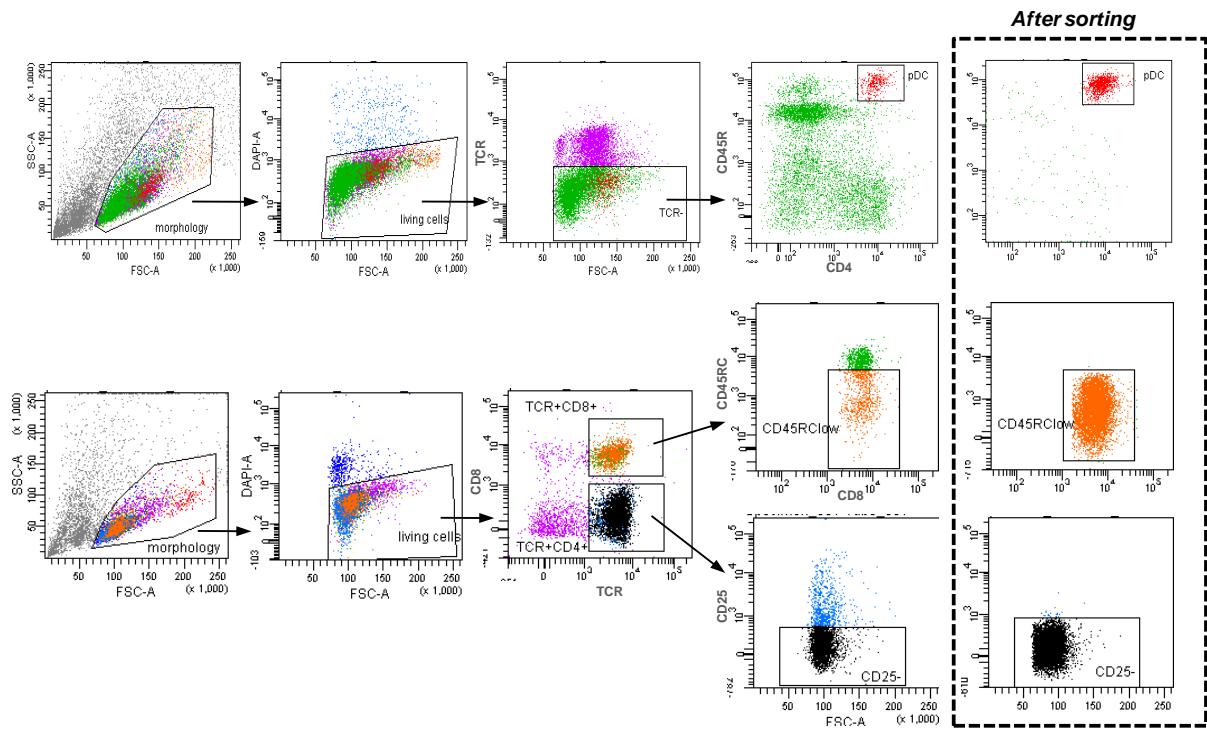

**Suppl. Figure 7: Sorting strategy for coculture experiments.** After gating cells by their morphology, dead cells were excluded by DAPI expression. pDCs were sorted by FACS Aria by gating on TCR negative cells, and CD4 and CD45R<sup>high</sup> double positive cells. CD4<sup>+</sup>T cells were sorted by gating on TCR and CD4 positive expression and CD25 negative expression. CD8<sup>+</sup>Tregs were sorted according to CD8<sup>+</sup>CD45RC<sup>low</sup> markers expression. Purity after cell sorting was greater than 99%.

**Suppl. Table 1. Picarda et al.**

| Vβ                            | CDR3β region | Jβ  | CDR3 length | Bulk naive spleen |    |    |    |    | Bulk treated graft |    |    |    |    |    |    | Du51 Tet <sup>+</sup> treated spleen |    |    |    | Bulk treated spleen |     |    |     |     |    | No. animals |   |   |   |   |  |
|-------------------------------|--------------|-----|-------------|-------------------|----|----|----|----|--------------------|----|----|----|----|----|----|--------------------------------------|----|----|----|---------------------|-----|----|-----|-----|----|-------------|---|---|---|---|--|
|                               |              |     |             | 1                 | 2  | 3  | 4  | 5  | 1                  | 2  | 3  | 4  | 5  | 6  | 7  | 1                                    | 2  | 3  | 4  | 1                   | 2   | 3  | 4   | 5   | 6  |             |   |   |   |   |  |
| 11                            | SLVGYEQ      | 2.6 | 7           | 0                 | 0  | 0  | 0  | 0  | 0                  | 0  | 0  | 0  | 0  | 0  | 0  | 0                                    | 0  | 0  | 0  | 0                   | 0   | 0  | 0   | 0   | 0  | 0           | 0 | 1 | 1 | 2 |  |
| 11                            | SLDGGYEQ     | 2.6 | 8           | 0                 | 0  | 0  | 1  | 1  | 0                  | 0  | 0  | 0  | 0  | 0  | 0  | 0                                    | 0  | 0  | 0  | 0                   | 0   | 0  | 0   | 0   | 0  | 0           | 0 | 0 | 0 | 2 |  |
| 11                            | SPGGAGDKI    | 2.3 | 9           | 0                 | 0  | 1  | 1  | 0  | 0                  | 0  | 0  | 0  | 0  | 0  | 0  | 0                                    | 0  | 0  | 0  | 0                   | 0   | 0  | 0   | 0   | 0  | 0           | 0 | 0 | 0 | 2 |  |
| 11                            | SSQGN DY     | 1.2 | 7           | 0                 | 3  | 0  | 0  | 9  | 0                  | 0  | 0  | 0  | 0  | 0  | 0  | 0                                    | 0  | 0  | 0  | 0                   | 0   | 0  | 0   | 0   | 0  | 0           | 0 | 0 | 0 | 2 |  |
| 11                            | SLGDGSYAEQ   | 2.1 | 10          | 0                 | 0  | 0  | 0  | 0  | 3                  | 0  | 0  | 0  | 0  | 0  | 0  | 0                                    | 0  | 0  | 0  | 0                   | 0   | 0  | 0   | 0   | 0  | 0           | 1 | 0 | 0 | 2 |  |
| 11                            | SLQGNTGQL    | 2.2 | 9           | 0                 | 0  | 0  | 0  | 0  | 0                  | 0  | 1  | 0  | 0  | 0  | 0  | 0                                    | 0  | 0  | 0  | 0                   | 0   | 0  | 0   | 0   | 0  | 0           | 1 | 0 | 0 | 2 |  |
| 11                            | SLRGETQ      | 2.5 | 7           | 0                 | 0  | 0  | 0  | 0  | 0                  | 0  | 0  | 0  | 0  | 0  | 2  | 0                                    | 0  | 0  | 0  | 0                   | 0   | 0  | 0   | 0   | 0  | 0           | 2 | 0 | 0 | 2 |  |
| 11                            | SLTGGRQNTL   | 2.4 | 10          | 0                 | 0  | 0  | 0  | 0  | 0                  | 0  | 0  | 0  | 0  | 0  | 1  | 0                                    | 0  | 0  | 0  | 0                   | 0   | 0  | 0   | 0   | 0  | 0           | 1 | 0 | 0 | 2 |  |
| 11                            | SLVGAEQ      | 2.1 | 7           | 0                 | 0  | 1  | 0  | 0  | 0                  | 0  | 0  | 0  | 0  | 0  | 0  | 0                                    | 0  | 0  | 0  | 0                   | 0   | 0  | 0   | 0   | 0  | 0           | 1 | 0 | 0 | 2 |  |
| 11                            | SPGGSYAEQ    | 2.1 | 9           | 0                 | 0  | 0  | 0  | 0  | 0                  | 0  | 0  | 0  | 0  | 0  | 6  | 0                                    | 0  | 0  | 0  | 0                   | 0   | 0  | 0   | 0   | 0  | 0           | 8 | 0 | 0 | 2 |  |
| 11                            | SSPTGENTL    | 2.4 | 9           | 0                 | 0  | 0  | 0  | 0  | 0                  | 0  | 0  | 0  | 0  | 0  | 0  | 0                                    | 2  | 0  | 0  | 0                   | 0   | 0  | 0   | 0   | 0  | 1           | 0 | 0 | 0 | 2 |  |
| 11                            | SLAVANQAI    | 1.5 | 9           | 0                 | 0  | 0  | 0  | 0  | 0                  | 0  | 4  | 0  | 0  | 0  | 0  | 0                                    | 0  | 1  | 0  | 0                   | 0   | 0  | 0   | 0   | 0  | 0           | 0 | 0 | 0 | 2 |  |
| 11                            | SLETQ        | 2.5 | 5           | 0                 | 0  | 1  | 0  | 0  | 0                  | 0  | 0  | 0  | 0  | 0  | 0  | 0                                    | 0  | 0  | 0  | 1                   | 0   | 0  | 0   | 0   | 0  | 0           | 0 | 0 | 0 | 2 |  |
| 11                            | SNQYDY       | 1.2 | 6           | 0                 | 0  | 1  | 0  | 0  | 0                  | 0  | 0  | 0  | 0  | 0  | 0  | 0                                    | 0  | 0  | 6  | 0                   | 0   | 0  | 0   | 0   | 0  | 0           | 0 | 0 | 0 | 2 |  |
| 11                            | SLAWGGYAEQ   | 2.1 | 10          | 0                 | 0  | 0  | 1  | 0  | 0                  | 0  | 6  | 0  | 0  | 0  | 0  | 0                                    | 0  | 0  | 0  | 0                   | 0   | 0  | 0   | 0   | 0  | 0           | 0 | 0 | 0 | 2 |  |
| 11                            | SQGGQNTL     | 2.4 | 8           | 0                 | 0  | 0  | 0  | 0  | 0                  | 12 | 0  | 0  | 0  | 0  | 0  | 0                                    | 0  | 0  | 0  | 0                   | 0   | 0  | 0   | 0   | 0  | 0           | 3 | 0 | 0 | 2 |  |
| Total number of TCR sequences |              |     |             | 68                | 72 | 73 | 70 | 75 | 44                 | 76 | 69 | 87 | 77 | 80 | 77 | 76                                   | 54 | 67 | 84 | 119                 | 103 | 99 | 113 | 116 | 96 |             |   |   |   |   |  |

| Vβ                            | CDR3β region | Jβ  | CDR3 length | Bulk naive spleen |    |    |    |    | Bulk treated graft |    |    |    |    |    | Du51 Tet <sup>+</sup> treated spleen |    |    |    | No. animals |   |   |   |   |   |   |   |   |   |   |   |   |  |
|-------------------------------|--------------|-----|-------------|-------------------|----|----|----|----|--------------------|----|----|----|----|----|--------------------------------------|----|----|----|-------------|---|---|---|---|---|---|---|---|---|---|---|---|--|
|                               |              |     |             | 1                 | 2  | 3  | 4  | 5  | 1                  | 2  | 3  | 4  | 5  | 6  | 1                                    | 2  | 3  | 4  |             |   |   |   |   |   |   |   |   |   |   |   |   |  |
| 18                            | GDSYEQ       | 2.6 | 7           | 0                 | 0  | 0  | 0  | 0  | 0                  | 0  | 0  | 0  | 1  | 0  | 1                                    | 1  | 0  | 0  | 1           | 0 | 0 | 0 | 0 | 0 | 0 | 0 | 0 | 0 | 4 |   |   |  |
| 18                            | GGWEETQ      | 2.5 | 7           | 0                 | 0  | 0  | 0  | 0  | 23                 | 3  | 4  | 0  | 0  | 0  | 0                                    | 0  | 0  | 0  | 0           | 0 | 0 | 0 | 0 | 0 | 0 | 0 | 0 | 0 | 0 | 3 |   |  |
| 18                            | GDSYAEQ      | 2.1 | 8           | 1                 | 0  | 0  | 0  | 1  | 0                  | 0  | 0  | 0  | 0  | 0  | 0                                    | 0  | 0  | 0  | 2           | 0 | 0 | 0 | 0 | 0 | 0 | 0 | 0 | 0 | 0 | 3 |   |  |
| 18                            | GDSYEQ       | 2.6 | 6           | 0                 | 0  | 0  | 1  | 2  | 0                  | 0  | 0  | 0  | 0  | 0  | 0                                    | 0  | 0  | 0  | 4           | 0 | 0 | 0 | 0 | 0 | 0 | 0 | 0 | 0 | 0 | 3 |   |  |
| 18                            | GEGSYAEQ     | 2.1 | 8           | 0                 | 0  | 4  | 0  | 1  | 0                  | 0  | 0  | 0  | 0  | 0  | 0                                    | 0  | 0  | 0  | 0           | 0 | 0 | 0 | 0 | 0 | 0 | 0 | 0 | 0 | 0 | 2 |   |  |
| 18                            | GERGSYEQ     | 2.6 | 8           | 1                 | 0  | 0  | 1  | 0  | 0                  | 0  | 0  | 0  | 0  | 0  | 0                                    | 0  | 0  | 0  | 0           | 0 | 0 | 0 | 0 | 0 | 0 | 0 | 0 | 0 | 0 | 2 |   |  |
| 18                            | GNTEV        | 1.1 | 5           | 0                 | 1  | 0  | 0  | 1  | 0                  | 0  | 0  | 0  | 0  | 0  | 0                                    | 0  | 0  | 0  | 0           | 0 | 0 | 0 | 0 | 0 | 0 | 0 | 0 | 0 | 0 | 2 |   |  |
| 18                            | GTGSYAEQ     | 2.1 | 8           | 0                 | 0  | 1  | 0  | 2  | 0                  | 0  | 0  | 0  | 0  | 0  | 0                                    | 0  | 0  | 0  | 0           | 0 | 0 | 0 | 0 | 0 | 0 | 0 | 0 | 0 | 0 | 2 |   |  |
| 18                            | GVGEQ        | 2.6 | 5           | 1                 | 0  | 1  | 0  | 0  | 0                  | 0  | 0  | 0  | 0  | 0  | 0                                    | 0  | 0  | 0  | 0           | 0 | 0 | 0 | 0 | 0 | 0 | 0 | 0 | 0 | 0 | 2 |   |  |
| 18                            | GTGLNTL      | 2.4 | 7           | 0                 | 0  | 0  | 0  | 0  | 0                  | 0  | 3  | 0  | 0  | 1  | 0                                    | 0  | 0  | 0  | 0           | 0 | 0 | 0 | 0 | 0 | 0 | 0 | 0 | 0 | 0 | 0 | 2 |  |
| 18                            | KDSNNQAI     | 1.5 | 8           | 0                 | 0  | 0  | 0  | 0  | 0                  | 0  | 0  | 0  | 0  | 0  | 0                                    | 0  | 0  | 0  | 1           | 0 | 4 | 0 | 0 | 0 | 0 | 0 | 0 | 0 | 0 | 2 |   |  |
| 18                            | GAGNERL      | 1.4 | 7           | 0                 | 1  | 0  | 0  | 0  | 0                  | 0  | 0  | 0  | 0  | 1  | 0                                    | 0  | 0  | 0  | 0           | 0 | 0 | 0 | 0 | 0 | 0 | 0 | 0 | 0 | 0 | 0 | 2 |  |
| 18                            | GDGYEQ       | 2.6 | 6           | 0                 | 0  | 0  | 1  | 0  | 0                  | 0  | 0  | 0  | 0  | 0  | 0                                    | 0  | 0  | 0  | 1           | 0 | 0 | 0 | 0 | 0 | 0 | 0 | 0 | 0 | 0 | 0 | 2 |  |
| 18                            | GTGNAEQ      | 2.1 | 7           | 0                 | 0  | 0  | 3  | 0  | 45                 | 0  | 0  | 0  | 0  | 0  | 0                                    | 0  | 0  | 0  | 0           | 0 | 0 | 0 | 0 | 0 | 0 | 0 | 0 | 0 | 0 | 0 | 2 |  |
| 18                            | GFGYEQ       | 2.6 | 6           | 0                 | 0  | 0  | 0  | 1  | 0                  | 0  | 0  | 0  | 0  | 27 | 0                                    | 0  | 0  | 0  | 0           | 0 | 0 | 0 | 0 | 0 | 0 | 0 | 0 | 0 | 0 | 0 | 2 |  |
| 18                            | GTDYAEQ      | 2.1 | 7           | 0                 | 0  | 0  | 0  | 1  | 0                  | 0  | 0  | 0  | 0  | 0  | 0                                    | 0  | 0  | 0  | 2           | 0 | 0 | 0 | 0 | 0 | 0 | 0 | 0 | 0 | 0 | 0 | 2 |  |
| 18                            | GGPGESSYEQ   | 2.6 | 10          | 0                 | 0  | 0  | 0  | 0  | 6                  | 0  | 0  | 0  | 0  | 0  | 0                                    | 0  | 0  | 0  | 0           | 2 | 0 | 0 | 0 | 0 | 0 | 0 | 0 | 0 | 0 | 0 | 2 |  |
| 18                            | DRGLGTL      | 2.4 | 7           | 0                 | 0  | 0  | 0  | 0  | 0                  | 0  | 0  | 3  | 0  | 0  | 0                                    | 0  | 0  | 0  | 1           | 0 | 0 | 0 | 0 | 0 | 0 | 0 | 0 | 0 | 0 | 0 | 2 |  |
| 18                            | LQGAGYDY     | 1.2 | 8           | 0                 | 0  | 0  | 0  | 0  | 0                  | 0  | 0  | 13 | 0  | 0  | 0                                    | 0  | 0  | 0  | 2           | 0 | 0 | 0 | 0 | 0 | 0 | 0 | 0 | 0 | 0 | 0 | 2 |  |
| 18                            | GEGGFYAEQ    | 2.1 | 9           | 0                 | 0  | 0  | 0  | 0  | 0                  | 0  | 0  | 0  | 2  | 0  | 0                                    | 0  | 0  | 0  | 2           | 0 | 0 | 0 | 0 | 0 | 0 | 0 | 0 | 0 | 0 | 0 | 2 |  |
| Total number of TCR sequences |              |     |             | 62                | 69 | 75 | 58 | 62 | 88                 | 54 | 80 | 94 | 89 | 77 | 55                                   | 70 | 81 | 79 |             |   |   |   |   |   |   |   |   |   |   |   |   |  |

**Suppl. Table 1:** Aa sequence, Jβ usage and CDR3 length of inter-individually shared clonotypes from the Vβ11 and Vβ18 repertoires in spleen and graft of naive and CD40Ig-treated rats 120 days after transplantation.



Suppl. Table 2. Picarda et al.

| Vβ | Du51 Tet <sup>+</sup> treated #1 | Jβ  | Length  | Frequency |
|----|----------------------------------|-----|---------|-----------|
| 11 | SSSRGTEV                         | 1.1 | 8       | 1         |
| 11 | RFGV                             | 1.1 | 4       | 1         |
| 11 | SWDRAWCDY                        | 1.2 | 9       | 1         |
| 11 | SSNYDY                           | 1.2 | 6       | 1         |
| 11 | SPRRYDY                          | 1.2 | 7       | 1         |
| 11 | SLVRGIYDY                        | 1.2 | 9       | 1         |
| 11 | SLWGCERL                         | 1.4 | 8       | 1         |
| 11 | SFLTLSNERL                       | 1.4 | 10      | 1         |
| 11 | SSRDSSNERL                       | 1.4 | 10      | 1         |
| 11 | SWDNNNQAQ                        | 1.5 | 9       | 1         |
| 11 | SPGTHNNQAQ                       | 1.5 | 10      | 1         |
| 11 | SHPGTDNQAQ                       | 1.5 | 10      | 1         |
| 11 | SSLRDRDNSPL                      | 1.6 | 11      | 1         |
| 11 | SSTGSHNSPL                       | 1.6 | 10      | 1         |
| 11 | SRTDSYAEQ                        | 2.1 | 9       | 2         |
| 11 | SLELWGELSYAEQ                    | 2.1 | 13      | 1         |
| 11 | SFGGRGAEQ                        | 2.1 | 9       | 1         |
| 11 | SLLDRGFAEQ                       | 2.1 | 10      | 1         |
| 11 | SPQGAYAEQ                        | 2.1 | 9       | 1         |
| 11 | SHYAEQ                           | 2.1 | 6       | 1         |
| 11 | SDREGDTGQL                       | 2.2 | 10      | 1         |
| 11 | SLTANTGQL                        | 2.2 | 9       | 1         |
| 11 | SSSGDGQL                         | 2.2 | 8       | 1         |
| 11 | SFLPGGNTGQL                      | 2.2 | 11      | 1         |
| 11 | SPGLTDKI                         | 2.3 | 8       | 1         |
| 11 | SPPGHYTDKI                       | 2.3 | 10      | 39        |
| 11 | SLVRNTL                          | 2.4 | 7       | 1         |
| 11 | SLDRLGSQNTL                      | 2.4 | 11      | 1         |
| 11 | SSPTGENTL                        | 2.4 | 9       | 2         |
| 11 | SFPGTFQETQ                       | 2.5 | 10      | 1         |
| 11 | SLVRRYIEQ                        | 2.6 | 9       | 1         |
| 11 | SPYCYEQ                          | 2.6 | 7       | 1         |
| 11 | PLRDPPRDEQ                       | 2.6 | 10      | 1         |
| 11 | SLVRGASYEQ                       | 2.6 | 10      | 1         |
| 11 | SESGTGNEQ                        | 2.6 | 9       | 1         |
| 11 | SLLGGVYEQ                        | 2.6 | 9       | 1         |
|    |                                  |     | total = | 76        |
| Vβ | Du51 Tet <sup>+</sup> treated #2 | Jβ  | Length  | Frequency |
| 11 | SFFREV                           | 1.1 | 6       | 1         |
| 11 | SLAGSGAYDY                       | 1.2 | 10      | 1         |
| 11 | SSDSSGNVL                        | 1.3 | 9       | 1         |
| 11 | MTASGNVL                         | 1.3 | 8       | 2         |
| 11 | VDSGNVL                          | 1.3 | 7       | 1         |
| 11 | SLWDRGGERL                       | 1.4 | 10      | 1         |
| 11 | SEDISNERL                        | 1.4 | 9       | 1         |
| 11 | SSNQAQ                           | 1.5 | 6       | 1         |
| 11 | SLAVANQAQ                        | 1.5 | 9       | 1         |
| 11 | SLRKANNQAQ                       | 1.5 | 10      | 1         |
| 11 | SLDSADSPL                        | 1.6 | 9       | 1         |
| 11 | SVGDSSYAEQ                       | 2.1 | 10      | 2         |
| 11 | SLYHWSSYAEQ                      | 2.1 | 11      | 1         |
| 11 | SQELGGSAAEQ                      | 2.1 | 10      | 1         |
| 11 | SLDRTSYAEQ                       | 2.1 | 10      | 2         |
| 11 | SFSAEQ                           | 2.1 | 6       | 2         |
| 11 | SARDFLTAEQ                       | 2.1 | 11      | 1         |
| 11 | SFAGNTGQL                        | 2.2 | 9       | 1         |
| 11 | SFVSNTGQL                        | 2.2 | 9       | 1         |
| 11 | SKGPLTGQL                        | 2.2 | 9       | 1         |
| 11 | SLFTGRSDKI                       | 2.3 | 10      | 1         |
| 11 | SPRDGTTDKI                       | 2.3 | 10      | 1         |
| 11 | SFGDSTTDKI                       | 2.3 | 10      | 1         |
| 11 | SDALGGYTDKI                      | 2.3 | 11      | 1         |
| 11 | TTGTENTL                         | 2.4 | 8       | 1         |
| 11 | SFRWKNTL                         | 2.4 | 8       | 1         |
| 11 | SENYRGQNTL                       | 2.4 | 10      | 1         |
| 11 | SLPLQGSNTL                       | 2.4 | 10      | 1         |

|           |                                        |           |               |                  |
|-----------|----------------------------------------|-----------|---------------|------------------|
| 11        | SQQQQNTL                               | 2.4       | 8             | 3                |
| 11        | SERYRGR                                | 2.4       | 7             | 1                |
| 11        | SLDWDPFQETQ                            | 2.5       | 11            | 1                |
| 11        | SNGTFQETQ                              | 2.5       | 9             | 1                |
| 11        | SPPGLGKETQ                             | 2.5       | 10            | 3                |
| 11        | SHGRGGQETQ                             | 2.5       | 10            | 1                |
| 11        | SRLGGGYEQ                              | 2.6       | 9             | 1                |
| 11        | SLPWDSPSSYEQ                           | 2.6       | 12            | 1                |
| 11        | SSRDSSYEQ                              | 2.6       | 9             | 1                |
| 11        | SLDSGNEQ                               | 2.6       | 8             | 1                |
| 11        | SLDWWGGPSSYEQ                          | 2.6       | 13            | 1                |
| 11        | SLEGGGSYEQ                             | 2.6       | 10            | 1                |
| 11        | SLDNVDRGQYEQ                           | 2.6       | 12            | 1                |
| 11        | SLDVTGIWEQ                             | 2.6       | 10            | 2                |
| 11        | SSIRGTYEQ                              | 2.6       | 9             | 1                |
| 11        | SLSDRGPYEQ                             | 2.6       | 11            | 1                |
| 11        | SVKGAYEQ                               | 2.6       | 8             | 1                |
|           |                                        |           | total =       | 54               |
| <b>Vβ</b> | <b>Du51 Tet<sup>+</sup> treated #3</b> | <b>Jβ</b> | <b>Length</b> | <b>Frequency</b> |
| 11        | SLNTALNTEV                             | 1.1       | 10            | 2                |
| 11        | SQNYDY                                 | 1.2       | 6             | 6                |
| 11        | SLDPTYNSPL                             | 1.6       | 10            | 4                |
| 11        | FASYAEQ                                | 2.1       | 7             | 9                |
| 11        | SLDRDWGGGSQNTL                         | 2.4       | 13            | 1                |
| 11        | SLGKETQ                                | 2.5       | 8             | 9                |
| 11        | SLNSGGGNQETQ                           | 2.5       | 12            | 4                |
| 11        | SLTDSYEQ                               | 2.6       | 8             | 3                |
| 11        | SWTLSYEQ                               | 2.6       | 8             | 27               |
| 11        | SSNRDWREQ                              | 2.6       | 9             | 2                |
|           |                                        |           | total =       | 67               |
| <b>Vβ</b> | <b>Du51 Tet<sup>+</sup> treated #4</b> | <b>Jβ</b> | <b>Length</b> | <b>Frequency</b> |
| 11        | STSDAGNVL                              | 1.3       | 9             | 1                |
| 11        | SSGDERL                                | 1.4       | 7             | 2                |
| 11        | SLAHPISNERL                            | 1.4       | 11            | 1                |
| 11        | SLFAGEL                                | 1.4       | 7             | 1                |
| 11        | SFWTISNERL                             | 1.4       | 10            | 1                |
| 11        | SLGGVSNERL                             | 1.4       | 10            | 1                |
| 11        | SLSGVGERL                              | 1.4       | 9             | 1                |
| 11        | SLDRGEAQ                               | 1.5       | 8             | 1                |
| 11        | STPRQNSPL                              | 1.6       | 9             | 1                |
| 11        | SSGTANSPL                              | 1.6       | 9             | 32               |
| 11        | SLRDWGGFYAEQ                           | 2.1       | 12            | 1                |
| 11        | SLDLGGPYAEQ                            | 2.1       | 11            | 13               |
| 11        | RGEGAEQ                                | 2.1       | 7             | 2                |
| 11        | SLRPTEQ                                | 2.1       | 7             | 2                |
| 11        | SLVPAEQ                                | 2.1       | 7             | 2                |
| 11        | SLDRGVDKI                              | 2.3       | 9             | 1                |
| 11        | SLAGGGTDKI                             | 2.3       | 10            | 2                |
| 11        | SLVGSTDKI                              | 2.3       | 9             | 1                |
| 11        | SFRDSQNTL                              | 2.4       | 9             | 1                |
| 11        | SLDWGRL                                | 2.4       | 7             | 2                |
| 11        | SPRDRETQ                               | 2.5       | 8             | 1                |
| 11        | SSDRVGQETQ                             | 2.5       | 10            | 1                |
| 11        | SLETQ                                  | 2.5       | 5             | 1                |
| 11        | SLRSDSYEQ                              | 2.6       | 10            | 2                |
| 11        | SGQGIGYEQ                              | 2.6       | 9             | 1                |
| 11        | SKGAGEQ                                | 2.6       | 7             | 1                |
| 11        | SLDFRGYEQ                              | 2.6       | 9             | 2                |
| 11        | SLEGAYEQ                               | 2.6       | 8             | 1                |
| 11        | YRGGSSYEQ                              | 2.6       | 9             | 1                |
| 11        | SLGTSYEQ                               | 2.6       | 8             | 1                |
| 11        | SSNPTGNYEQ                             | 2.6       | 10            | 1                |
| 11        | DGNRGDYEH                              | 2.6       | 9             | 1                |
| 11        | SLVGTGFYEQ                             | 2.6       | 10            | 1                |
|           |                                        |           | total =       | 84               |

**Suppl. Table 2:** Aa sequences, Jβ usage, CDR3 length and frequency of clonotypes from the Vβ11 repertoire in spleen of Du51 Tet<sup>+</sup> CD8<sup>+</sup>CD40Ig-treated rats 120 days after transplantation.

Suppl. Table 3. Picarda et al.

| Vβ | Du51 Tet <sup>+</sup> treated #1 | Jβ  | Length  | Frequency |
|----|----------------------------------|-----|---------|-----------|
| 18 | ASGSAEV                          | 1.1 | 7       | 1         |
| 18 | GRGRV                            | 1.1 | 5       | 1         |
| 18 | STGSTEV                          | 1.1 | 7       | 1         |
| 18 | GVGGNYDY                         | 1.2 | 8       | 1         |
| 18 | GQGLNYDY                         | 1.2 | 8       | 1         |
| 18 | GRDRANYDY                        | 1.2 | 9       | 1         |
| 18 | GGGSNERL                         | 1.4 | 8       | 2         |
| 18 | TQGSNERL                         | 1.4 | 8       | 1         |
| 18 | GECSNERL                         | 1.4 | 8       | 1         |
| 18 | GDRQSSNERL                       | 1.4 | 11      | 1         |
| 18 | GQGKERL                          | 1.4 | 7       | 1         |
| 18 | GGTVPV                           | 1.4 | 6       | 1         |
| 18 | GQGERAEQ                         | 2.1 | 8       | 1         |
| 18 | EEGSRYAEQ                        | 2.1 | 9       | 1         |
| 18 | GPGLSYAEQ                        | 2.1 | 9       | 1         |
| 18 | GATGDSYAEQ                       | 2.1 | 10      | 1         |
| 18 | GDSGGFPYAEQ                      | 2.1 | 11      | 1         |
| 18 | GDSGDYAEQ                        | 2.1 | 9       | 1         |
| 18 | GVGFSYAEQ                        | 2.1 | 9       | 3         |
| 18 | GEDGYSYAEQ                       | 2.1 | 10      | 1         |
| 18 | FGQGFAEQ                         | 2.1 | 8       | 1         |
| 18 | LDRVYAEQ                         | 2.1 | 8       | 2         |
| 18 | GTGTYAEQ                         | 2.1 | 8       | 1         |
| 18 | APGTGGPSYAEQ                     | 2.1 | 12      | 1         |
| 18 | GYDSDKI                          | 2.3 | 7       | 1         |
| 18 | GRTDKI                           | 2.3 | 6       | 1         |
| 18 | GTGGSTDKI                        | 2.3 | 9       | 2         |
| 18 | GAPGLPTDKI                       | 2.3 | 10      | 1         |
| 18 | TGTDKI                           | 2.3 | 6       | 2         |
| 18 | GWGVQNTL                         | 2.4 | 8       | 3         |
| 18 | GDWGLGQETQ                       | 2.5 | 10      | 2         |
| 18 | GGLGEETQ                         | 2.5 | 8       | 1         |
| 18 | GFETGGVNSYEQ                     | 2.6 | 12      | 1         |
| 18 | RHFSYEQ                          | 2.6 | 7       | 1         |
| 18 | GSDGSSYEQ                        | 2.6 | 9       | 1         |
| 18 | GDWGAEQ                          | 2.6 | 7       | 1         |
| 18 | GGLGGASYEQ                       | 2.6 | 10      | 1         |
| 18 | GDGTLRSYEQ                       | 2.6 | 10      | 1         |
| 18 | GDSSYEQ                          | 2.6 | 7       | 1         |
| 18 | GPNLQGGYEQ                       | 2.6 | 10      | 1         |
| 18 | GVGRSYEQ                         | 2.6 | 8       | 1         |
| 18 | GEGTASYEQ                        | 2.6 | 9       | 4         |
| 18 | GVVYEQ                           | 2.6 | 6       | 1         |
|    |                                  |     | total = | 55        |
| Vβ | Du51 Tet <sup>+</sup> treated #2 | Jβ  | Length  | Frequency |
| 18 | GRSGGLTEV                        | 1.1 | 9       | 1         |
| 18 | GEGNTEV                          | 1.1 | 7       | 4         |
| 18 | LQGAGYDY                         | 1.2 | 8       | 2         |
| 18 | GQGRYDY                          | 1.2 | 7       | 2         |
| 18 | GERDERL                          | 1.4 | 7       | 1         |
| 18 | RGHNQAQ                          | 1.5 | 7       | 1         |
| 18 | KDSNNQAQ                         | 1.5 | 8       | 1         |
| 18 | GGTGDNSPL                        | 1.6 | 9       | 1         |
| 18 | GDGYNSPL                         | 1.6 | 8       | 1         |
| 18 | GDRENNNSPL                       | 1.6 | 9       | 2         |
| 18 | GRDRSYAEQ                        | 2.1 | 9       | 1         |
| 18 | GTDYAEQ                          | 2.1 | 7       | 2         |
| 18 | GAEQ                             | 2.1 | 4       | 2         |
| 18 | GGQGYSYAEQ                       | 2.1 | 10      | 2         |
| 18 | AGGDAEQ                          | 2.1 | 7       | 1         |
| 18 | GAVWVGARYAEQ                     | 2.1 | 11      | 1         |
| 18 | GFVSYTEQ                         | 2.1 | 8       | 1         |
| 18 | GEGGFYAEQ                        | 2.1 | 9       | 2         |
| 18 | GDRVAEQ                          | 2.1 | 7       | 4         |
| 18 | GDSAEQ                           | 2.1 | 6       | 1         |
| 18 | GDRLSYAEQ                        | 2.1 | 9       | 1         |
| 18 | GRGRVGAEQ                        | 2.1 | 9       | 1         |
| 18 | GDRLGGPYAEQ                      | 2.1 | 11      | 1         |

|           |                                        |           |               |                  |
|-----------|----------------------------------------|-----------|---------------|------------------|
| 18        | GGLGGPYAEQ                             | 2.1       | 10            | 1                |
| 18        | GDRQGPDAEQ                             | 2.1       | 10            | 2                |
| 18        | GARRNAEQ                               | 2.1       | 8             | 1                |
| 18        | GGHPSYAEQ                              | 2.1       | 9             | 1                |
| 18        | SGSNYAEQ                               | 2.1       | 8             | 1                |
| 18        | GERRTGGVPYAEQ                          | 2.1       | 13            | 1                |
| 18        | GTGGHTGQL                              | 2.2       | 9             | 1                |
| 18        | GEQGLTDKI                              | 2.3       | 9             | 2                |
| 18        | GGRDDKI                                | 2.3       | 7             | 3                |
| 18        | DRGLGTL                                | 2.4       | 7             | 1                |
| 18        | GDWYSQNTL                              | 2.4       | 9             | 1                |
| 18        | GSGLGRNTL                              | 2.4       | 9             | 2                |
| 18        | ETGSQNTL                               | 2.4       | 8             | 1                |
| 18        | GQETQ                                  | 2.5       | 5             | 1                |
| 18        | NQETQ                                  | 2.5       | 5             | 3                |
| 18        | GGSLETQ                                | 2.5       | 7             | 1                |
| 18        | GDGYEQ                                 | 2.6       | 6             | 1                |
| 18        | GSGEDSYEQ                              | 2.6       | 9             | 1                |
| 18        | GGRDRYEQ                               | 2.6       | 9             | 1                |
| 18        | GLTLSYEQ                               | 2.6       | 8             | 1                |
| 18        | GAGQIYEQ                               | 2.6       | 8             | 1                |
| 18        | GRGGGGVYEQ                             | 2.6       | 10            | 1                |
| 18        | GNFYEQ                                 | 2.6       | 6             | 1                |
| 18        | GEQGRNEQ                               | 2.6       | 8             | 1                |
| 18        | GESSYEQ                                | 2.6       | 7             | 1                |
| 18        | GDSSYEQ                                | 2.6       | 7             | 1                |
| 18        | GDRVYEQ                                | 2.6       | 7             | 1                |
|           |                                        |           | total =       | 70               |
| <b>Vβ</b> | <b>Du51 Tet<sup>+</sup> treated #3</b> | <b>Jβ</b> | <b>Length</b> | <b>Frequency</b> |
| 18        | GDSRALV                                | 1.1       | 7             | 1                |
| 18        | DREGITEV                               | 1.1       | 8             | 1                |
| 18        | RVIGVEV                                | 1.1       | 7             | 1                |
| 18        | GTGSLNTEV                              | 1.1       | 9             | 2                |
| 18        | GRWRVGDY                               | 1.2       | 8             | 1                |
| 18        | GSTGDYDY                               | 1.2       | 8             | 1                |
| 18        | ANSGNVL                                | 1.3       | 7             | 1                |
| 18        | GEWGANQAQ                              | 1.5       | 9             | 1                |
| 18        | GGQQNQAQ                               | 1.5       | 8             | 1                |
| 18        | GSVDDL                                 | 1.6       | 6             | 1                |
| 18        | GDVGAGYNSPL                            | 1.6       | 11            | 2                |
| 18        | CTPGLTINSPL                            | 1.6       | 11            | 1                |
| 18        | HSYAEQ                                 | 2.1       | 6             | 1                |
| 18        | GAAEQ                                  | 2.1       | 5             | 2                |
| 18        | GDGLYAEQ                               | 2.1       | 8             | 1                |
| 18        | GDGSYAEQ                               | 2.1       | 8             | 2                |
| 18        | GVRGGYAEQ                              | 2.1       | 9             | 1                |
| 18        | GETGVYAEQ                              | 2.1       | 9             | 3                |
| 18        | VVLETGGGAEQ                            | 2.1       | 11            | 1                |
| 18        | TTHTGQL                                | 2.2       | 7             | 6                |
| 18        | GPGQNTGQL                              | 2.2       | 9             | 1                |
| 18        | GAAGGDGQL                              | 2.2       | 9             | 1                |
| 18        | GDRDRGSDKI                             | 2.3       | 10            | 1                |
| 18        | APDWEEQNTL                             | 2.4       | 11            | 2                |
| 18        | GEWFGRGMETQ                            | 2.5       | 11            | 1                |
| 18        | GEGDPETQ                               | 2.5       | 8             | 3                |
| 18        | GDRGVQETQ                              | 2.5       | 9             | 1                |
| 18        | GEEGYEQ                                | 2.6       | 7             | 4                |
| 18        | GQGWYEQ                                | 2.6       | 7             | 1                |
| 18        | GDFRGNIEQ                              | 2.6       | 9             | 1                |
| 18        | NRDRGHEQ                               | 2.6       | 8             | 1                |
| 18        | GSGDSYEQ                               | 2.6       | 8             | 1                |
| 18        | EASGSYEQ                               | 2.6       | 8             | 2                |
| 18        | GEYEQ                                  | 2.6       | 5             | 2                |
| 18        | GGPGESSYEQ                             | 2.6       | 10            | 2                |
| 18        | LAGYEQ                                 | 2.6       | 6             | 2                |
| 18        | GDPLYEQ                                | 2.6       | 7             | 1                |
| 18        | GDFYEQ                                 | 2.6       | 6             | 1                |
| 18        | GDSYEQ                                 | 2.6       | 6             | 4                |
| 18        | GDAYEQ                                 | 2.6       | 6             | 17               |
| 18        | GTGSYEQ                                | 2.6       | 7             | 1                |
|           |                                        |           | total =       | 81               |

| Vβ | Du51 Tet <sup>+</sup> treated #4 | Jβ  | Length  | Frequency |
|----|----------------------------------|-----|---------|-----------|
| 18 | GEGDLNTEV                        | 1.1 | 9       | 1         |
| 18 | RDNTEV                           | 1.1 | 6       | 1         |
| 18 | GDAGEV                           | 1.1 | 6       | 2         |
| 18 | ATGSTEV                          | 1.1 | 7       | 2         |
| 18 | GDWYYDY                          | 1.2 | 7       | 1         |
| 18 | GESGPGNVL                        | 1.3 | 9       | 1         |
| 18 | GNQAQ                            | 1.5 | 5       | 1         |
| 18 | KDSNNQAQ                         | 1.5 | 8       | 4         |
| 18 | VTGINSPL                         | 1.6 | 8       | 1         |
| 18 | GDNSPL                           | 1.6 | 6       | 1         |
| 18 | GRGDNSPL                         | 1.6 | 8       | 1         |
| 18 | GQW                              | 2.1 | 3       | 2         |
| 18 | NDRAEQ                           | 2.1 | 6       | 1         |
| 18 | GLNSYAEQ                         | 2.1 | 8       | 1         |
| 18 | GSAGFAEQ                         | 2.1 | 8       | 2         |
| 18 | GGSSYAGQ                         | 2.1 | 8       | 1         |
| 18 | GLDSYAEQ                         | 2.1 | 8       | 1         |
| 18 | GGGAEEDSYAEQ                     | 2.1 | 13      | 2         |
| 18 | GDSWTGGGAYAEQ                    | 2.1 | 13      | 2         |
| 18 | GDTGGQNSYAEQ                     | 2.1 | 12      | 1         |
| 18 | ERQAYAEQ                         | 2.1 | 8       | 1         |
| 18 | GGWGGVYAEQ                       | 2.1 | 10      | 1         |
| 18 | GGTLWGQL                         | 2.2 | 8       | 1         |
| 18 | GGATDKI                          | 2.3 | 7       | 1         |
| 18 | GERQGAGDKI                       | 2.3 | 10      | 1         |
| 18 | RNTDKI                           | 2.3 | 6       | 5         |
| 18 | VSGSDKI                          | 2.3 | 7       | 1         |
| 18 | LRDRLTDKI                        | 2.3 | 9       | 1         |
| 18 | GTQGFSDKI                        | 2.3 | 9       | 1         |
| 18 | ASGSDKI                          | 2.3 | 7       | 2         |
| 18 | EPGPSQNTL                        | 2.4 | 9       | 1         |
| 18 | RRDWGGKNTL                       | 2.4 | 10      | 1         |
| 18 | GEGRETQ                          | 2.5 | 7       | 1         |
| 18 | GETRRWQETQ                       | 2.5 | 10      | 1         |
| 18 | GDLETQ                           | 2.5 | 6       | 1         |
| 18 | GDLEGTGMETQ                      | 2.5 | 11      | 1         |
| 18 | GPDRGETQ                         | 2.5 | 8       | 1         |
| 18 | GRDWGGPQETQ                      | 2.5 | 11      | 1         |
| 18 | GEDWESYEQ                        | 2.6 | 9       | 1         |
| 18 | GLGGNSYEQ                        | 2.6 | 9       | 1         |
| 18 | GYEQ                             | 2.6 | 4       | 1         |
| 18 | GDRAEQ                           | 2.6 | 6       | 7         |
| 18 | GDRYEQ                           | 2.6 | 6       | 1         |
| 18 | GGDSYEQ                          | 2.6 | 7       | 1         |
| 18 | GDNYEQ                           | 2.6 | 6       | 6         |
| 18 | GDLVVPYEQ                        | 2.6 | 9       | 1         |
| 18 | GDSSYEQ                          | 2.6 | 7       | 1         |
| 18 | GEGQSSYEQ                        | 2.6 | 9       | 1         |
| 18 | GGRLEQ                           | 2.6 | 6       | 1         |
| 18 | DPRDRGPEQ                        | 2.6 | 9       | 1         |
| 18 | GDSQYEQ                          | 2.6 | 7       | 1         |
| 18 | GDREQ                            | 2.6 | 5       | 1         |
| 18 | GWDSYEQ                          | 2.6 | 7       | 1         |
| 18 | VVSYEQ                           | 2.6 | 6       | 1         |
|    |                                  |     | total = | 79        |

**Suppl. Table 3:** Aa sequences, Jβ usage, CDR3 length and frequency of clonotypes from the Vβ18 repertoire in spleen of Du51 Tet<sup>+</sup> CD8<sup>+</sup>CD40Ig-treated rats 120 days after transplantation.
